# Supplementary material
Source: PubMed Central journal article supplement (PMC9535927)
Supplement: NIHMS1836966-supplement-Supporting_Information.pdf [file NIHMS1836966-supplement-Supporting_Information.pdf]

## Supporting Information

### Interaction of the neutral amino acid transporter ASCT2 with basic amino acids

<sup>a</sup>Elias Ndaru, <sup>b</sup>Rachel-Ann A. Garibsingh, <sup>a</sup>Laura Zielewicz, <sup>b</sup>Avner Schlessinger and <sup>a</sup>Christof Grewer

<sup>a</sup>Department of Chemistry, Binghamton University, 4400 Vestal Pkwy East, Binghamton, NY 13902

<sup>b</sup>Department of Pharmacological Sciences, Icahn School of Medicine at Mount Sinai, New York, NY 10029

Corresponding author: Christof Grewer, Department of Chemistry, Binghamton University, 4400 Vestal Pkwy East, Binghamton, NY 13902, [cgrewer@binghamton.edu](mailto:cgrewer@binghamton.edu)

| ASCT2 outward-occluded |                                        |             |
|------------------------|----------------------------------------|-------------|
| Rank                   | Ligand                                 | Glide Score |
| 1                      | L-DAP (positively charged) (Figure 1G) | -6.88       |
| 2                      | L-DAB (Figure 1B)                      | -6.36       |
| 3                      | L-DAP (negatively charged) (Figure 1D) | -6.26       |
| 4                      | L-Asparagine                           | -6.24       |
| 5                      | L-DAP (neutral beta) (Figure 1F)       | -6.21       |
| 6                      | L-DAP (neutral alpha) (Figure 1E)      | -6.09       |
| 7                      | L-Cysteine                             | -5.30       |
| 8                      | L-Serine                               | -5.15       |
| 9                      | L-Glutamine                            | -5.01       |
| 10                     | L-Threonine                            | -4.85       |
| 11                     | L-Alanine                              | -4.72       |
| 12                     | L-Leucine                              | -4.66       |
| 13                     | L-Methionine                           | -4.60       |
| ASCT2 outward-open     |                                        |             |
| 1                      | L-DAP (neutral beta) (Figure 1F)       | -5.78       |
| 2                      | L-DAP (positively charged) (Figure 1G) | -5.59       |
| 3                      | L-DAP (negatively charged) (Figure 1D) | -5.58       |
| 4                      | L-DAB                                  | -5.49       |
| 5                      | L-DAP (neutral alpha) (Figure 1E)      | -5.24       |
| 6                      | L-Asparagine                           | -4.84       |
| 7                      | L-Glutamine                            | -4.62       |
| 8                      | L-Methionine                           | -4.52       |
| 9                      | L-Leucine                              | -4.48       |
| 10                     | L-Threonine                            | -4.34       |
| 11                     | L-Cysteine                             | -4.17       |
| 12                     | L-Serine                               | -3.80       |
| 13                     | L-Alanine                              | -3.26       |

**Supplementary Table 1.** Glide docking scores for ligands docked to ASCT2 homology models in 2 conformations.

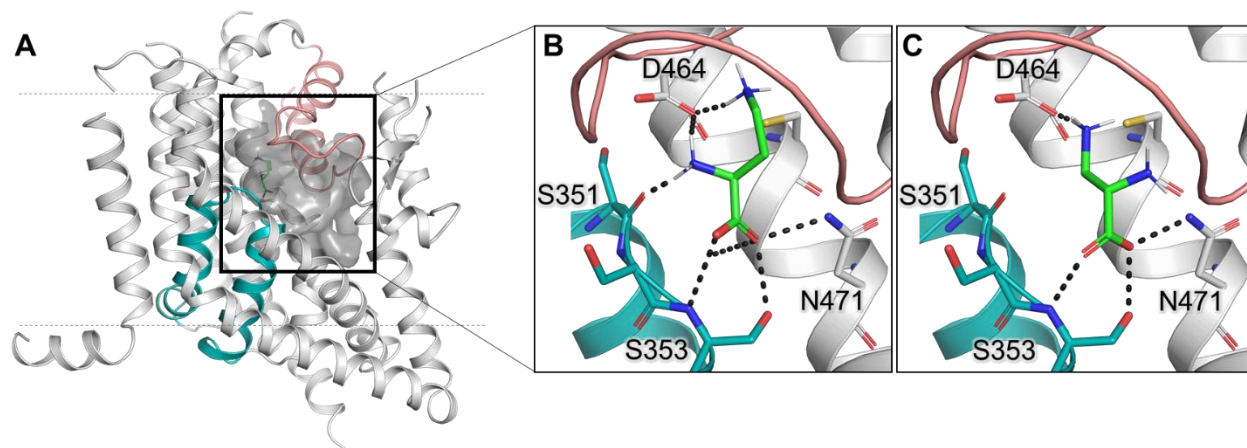

**Supplementary Figure 1.** Docking pose of L-DAB and L-DAP. **(A)** Side view of the ASCT2 homology model in the outward-open conformation (gray ribbon) with docked L-DAP (green sticks). The substrate binding site is highlighted with dark gray shadow; HP1 is shown in teal and HP2 in salmon. Broken lines indicate the approximate location of the membrane. **(B)** Docking pose of L-DAB and **(C)** L-DAP. Residues predicted to make hydrogen bonds (dark gray dashes) are labeled. Oxygen, nitrogen and sulfur atoms are represented in red, blue, and yellow, respectively.
